# Supplementary material for: Problems and Solutions in Click Chemistry Applied to Drug Probes
Source: PubMed Central journal article supplement (PMC5080546; doi:10.1038/srep35579), 2016-10-26
Supplement: srep35579-s1.pdf [file srep35579-s1.pdf]

Supplemental Information

## Problems and Solutions in Click Chemistry Applied to Drug Probes

Weilong Zhong,<sup>1,2,#</sup> Bo Sun,<sup>1,2,#</sup> Cheng Lu,<sup>1,2#</sup> Hengheng Yu,<sup>1,2,#</sup> Changhua Wang,<sup>1,2</sup> Lingfei

He,<sup>1,2</sup> Ju Gu,<sup>1,2</sup> Shuang Chen,<sup>2</sup> Yanrong Liu,<sup>2</sup> Xiangyan Jing,<sup>1,2</sup> Zhun Bi,<sup>1</sup> Guang Yang,<sup>1</sup> Honggang

Zhou,<sup>1,2</sup> Tao Sun,<sup>1,2,\*</sup> Cheng Yang<sup>1,2,\*</sup>

<sup>1</sup>State Key Laboratory of Medicinal Chemical Biology and College of Pharmacy, Nankai University, Tianjin, China

<sup>2</sup>Tianjin Key Laboratory of Molecular Drug Research, Tianjin International Joint Academy of Biomedicine, Tianjin, China

\*Correspondence:

Cheng Yang: [cyang66\\_2001@yahoo.com](mailto:cyang66_2001@yahoo.com);

Tao Sun: [sunrockmia@hotmail.com](mailto:sunrockmia@hotmail.com)

# These authors contributed equally to this work.

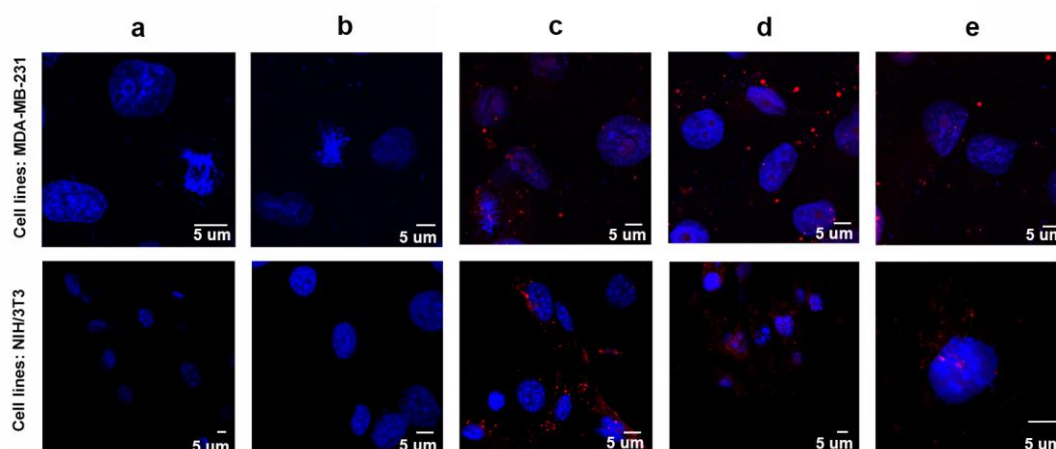

**Figure S1. Related to Figure 1. The click reaction results in catalyzed copper ions with or without copper ion catalysis.** Confocal fluorescence results for **a**, rhodamine. **b**, rhodamine-piperazine. **c**, rhodamine-piperazine-alkyne. **d**, rhodamine-piperazine-alkyne treatment with EDTA. **e**, rhodamine-piperazine-alkyne without catalysts.

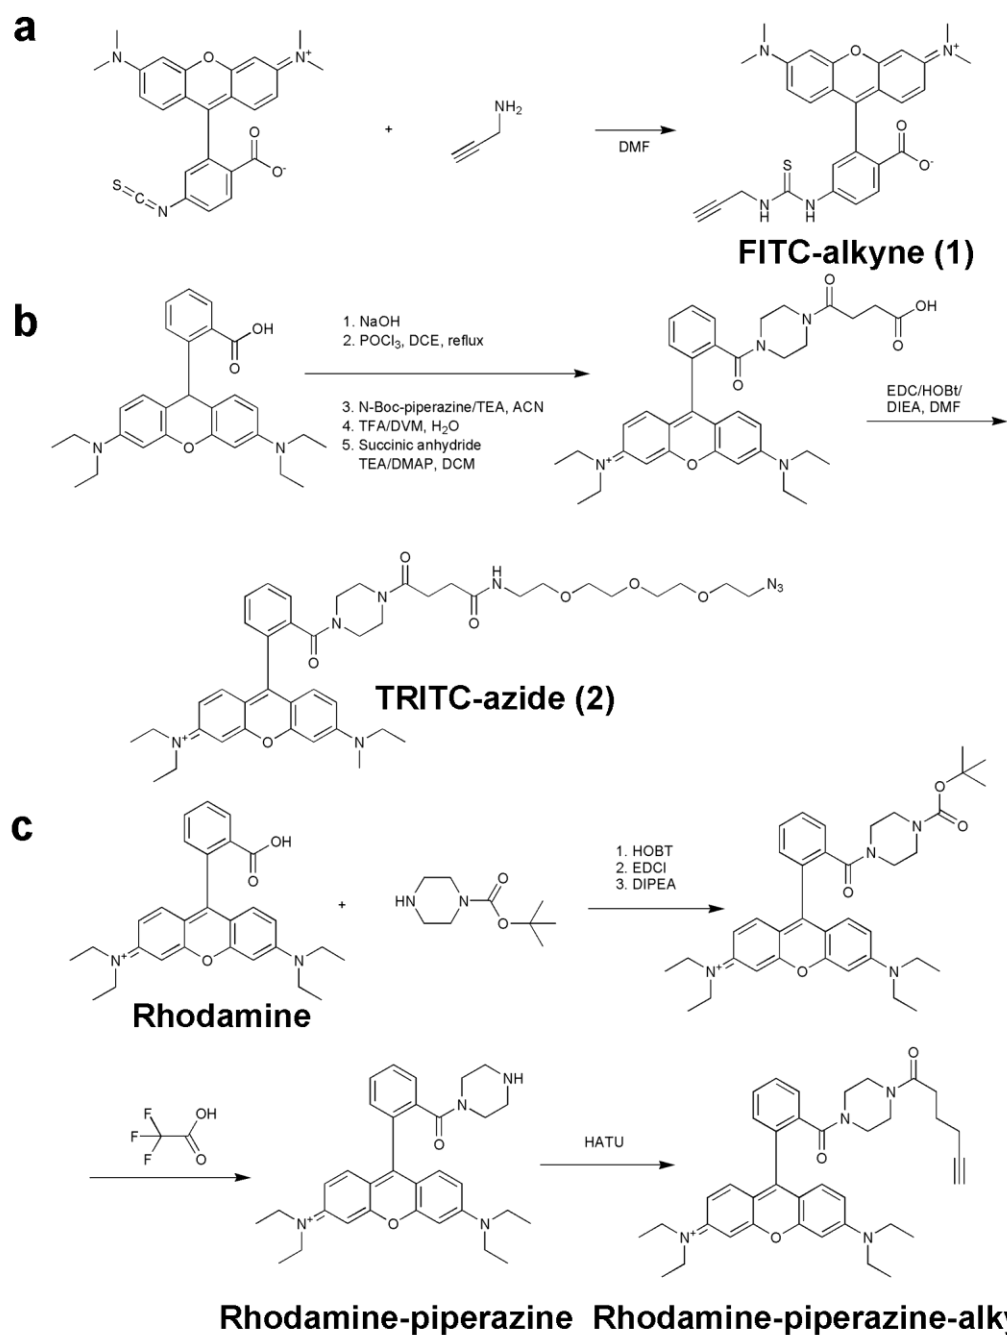

**Figure S2.** Related to Figure 1. Synthesis of FITC-alkyne, TRITC-azide and rhodamine-piperazine-alkyne. **a**, Synthesis of FITC-alkyl. **b**, Synthesis of TRITC-azide. **c**, Synthesis of rhodamine-piperazine-alkyne.

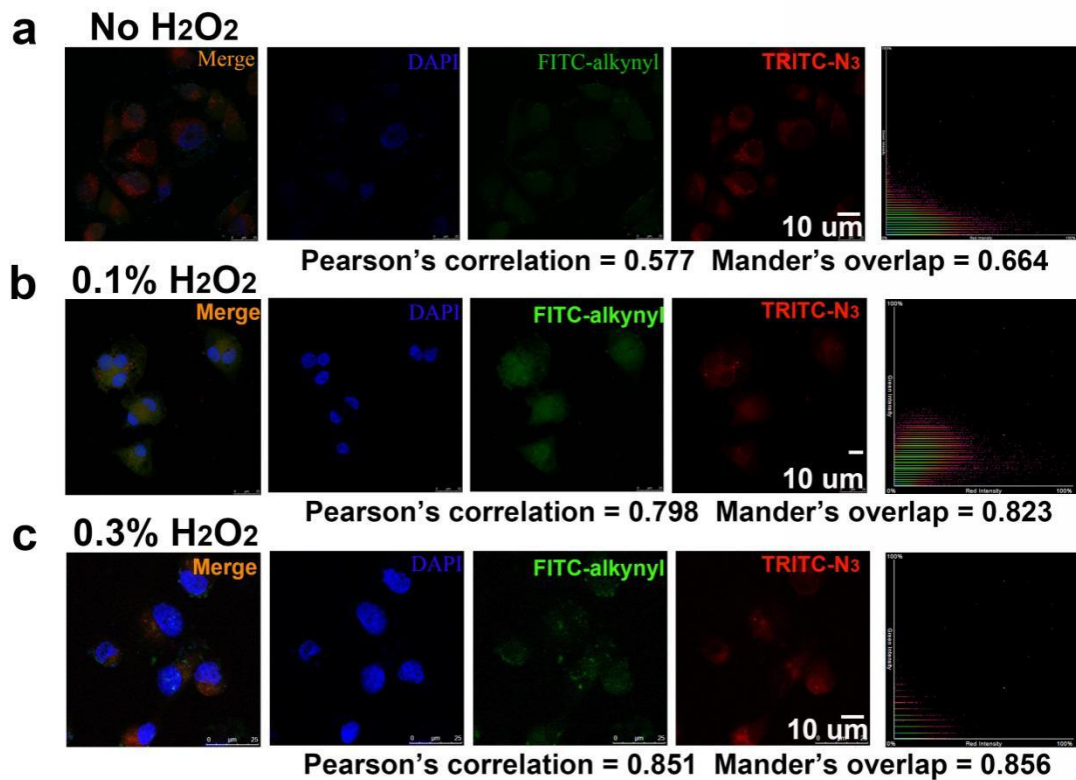

**Figure S3. Related to Figure 1. Co-localization efficiency at different hydrogen peroxide concentrations. a,** Cells without hydrogen peroxide treatment. Effects of **b,** 0.1% hydrogen peroxide treatment and **c,** 0.3% hydrogen peroxide treatment. Hydrogen peroxide eliminates the interference of cysteine and improves the co-localization efficiency of FITC-alkyne and TRITC-azide in living cells.

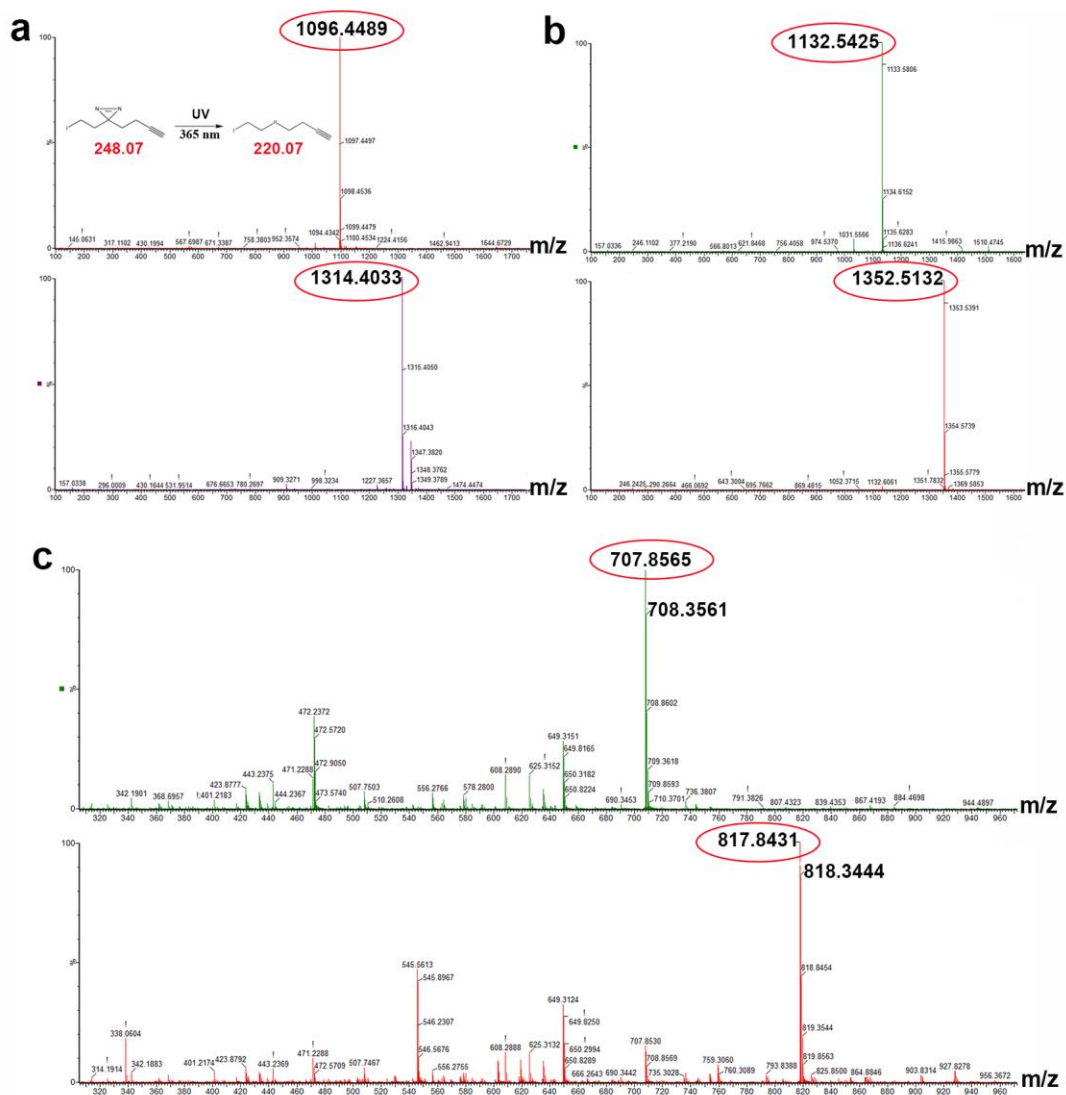

**Figure S4. Related to Figure 2. Molecular weight changes of peptide 1-3 after reaction with alkyl diazirine under 365 nm UV irradiation.**

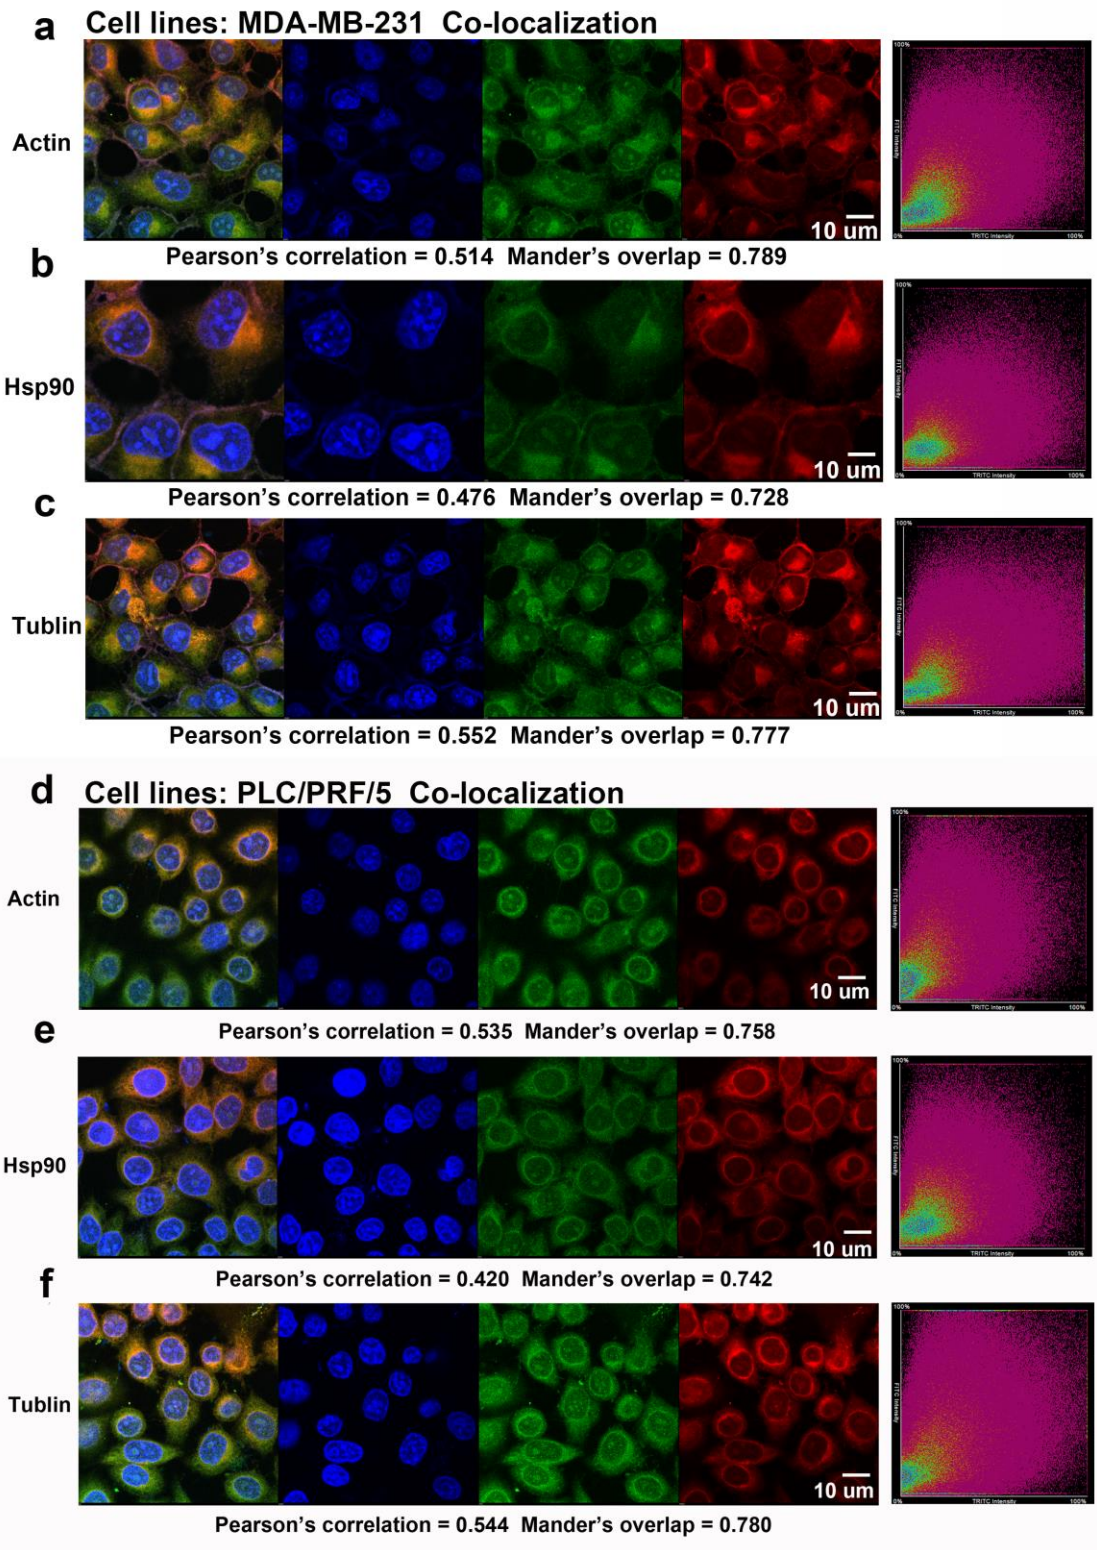

Figure S5. Related to Figure 3. Co-localization of alkyl diazirine (AD) and tubulin, actin and HSP90 in 231 and PLC cells.

**Table S1. The reaction efficiencies of four peptides reacting with benzophenone and alkyl diazirine (AD).**

| Peptide         | 365 nm   |          |          |         | 350 nm |          |          |        |
|-----------------|----------|----------|----------|---------|--------|----------|----------|--------|
|                 | P1       | P2       | P3       | P4      | P1     | P2       | P3       | P4     |
| Benzophenone    | 0.539    | 0.444    | 1.943    | 1.965   | NA     | NA       | NA       | 15.403 |
| Alkyl diazirine | 275.899  | 919.674  | 177.186  | 26.195  | NA     | 121.66   | 70.738   | 1366.7 |
|                 | 2326.055 | 2532.69  | 2746.684 | 2.891   | NA     | 3474.202 | 6637.455 | NA     |
|                 | 1573.198 | 3840.942 | 1497.542 | 261.512 |        |          |          |        |

Note:

P1: SGGDILQSGCCG; P2: INTQWLLSGT; P3: ARNEHKMFPWV; P4: ARDCEHKMFPYV.

Red values represent the peak area of the products, and blue values represent the peak area of the reactants. The results show that alkyl diazirine readily reacts with the peptide under 365 nm UV irradiation. In contrast, the benzophenone reaction efficiency was low under both 350 nm and 365 nm UV irradiation.
